# Supplementary material for: Novel PVAMA/GelMA aerogels prepared by liquid-phase collection of photoinitiated polymerisation: injectable and flowable low-density 3D scaffolds for bone regeneration
Source: Royal Society of Chemistry journal article supplement (doi:10.1039/d3nr02398b), 2023-01-01
Supplement: d3nr02398b1.pdf [file d3nr02398b1.pdf]

## Supporting Information

### **Novel PVAMA/GelMA aerogels prepared by liquid-phase collection of photoinitiated polymerisation: injectable and flowable low-density 3D scaffolds for bone regeneration**

*Manxuan Liu,<sup>a,1</sup> Yihan Sun,<sup>b,c,1</sup> Lijun Liu,<sup>a</sup> Zhiying Zhang,<sup>a</sup> Maierhaba Aimaijiang,<sup>a</sup>  
Lu Zhang,<sup>a</sup> Sezhen Quni,<sup>a</sup> Minghui Li,<sup>a</sup> Xiuyu Liu,<sup>a</sup> Daowei Li,<sup>a</sup> Junhu Zhang,<sup>\*,b,c</sup> and  
Yanmin Zhou<sup>\*,a</sup>*

a.Jilin Provincial Key Laboratory of Tooth Development and Bone Remodeling,  
Hospital of Stomatology, Jilin University, 763 Huguang Road, Changchun 130021, P.  
R. China

b.Joint Laboratory of Opto-Functional Theranostics in Medicine and Chemistry, The  
First Hospital of Jilin University, 1 Xinmin Street, Changchun 130021, P. R. China

c.State Key Laboratory of Supramolecular Structure and Materials, College of  
Chemistry, Jilin University, 2699 Qianjin Avenue, Changchun 130012, P. R. China

1. These authors contributed equally to this work

\*. Corresponding author

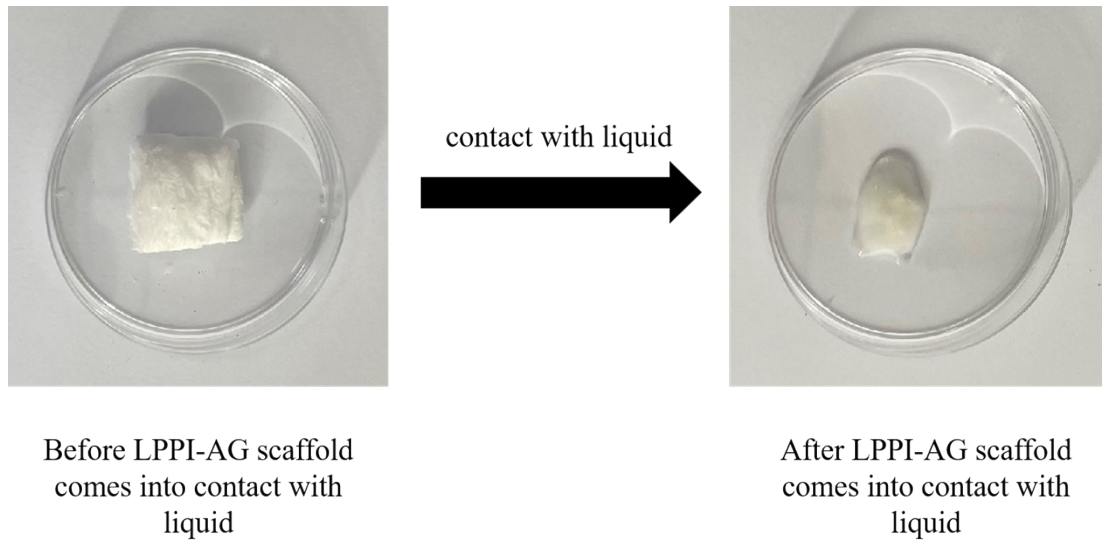

**Figure S1.** Changes in LPPI-AG scaffold before and after contact with solution.

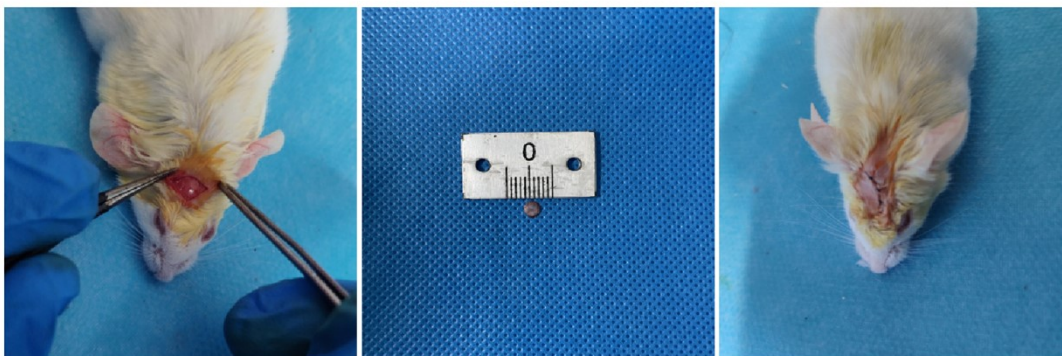

**Figure S2.** Establishment of a mouse skull defect model with a diameter of 4mm.

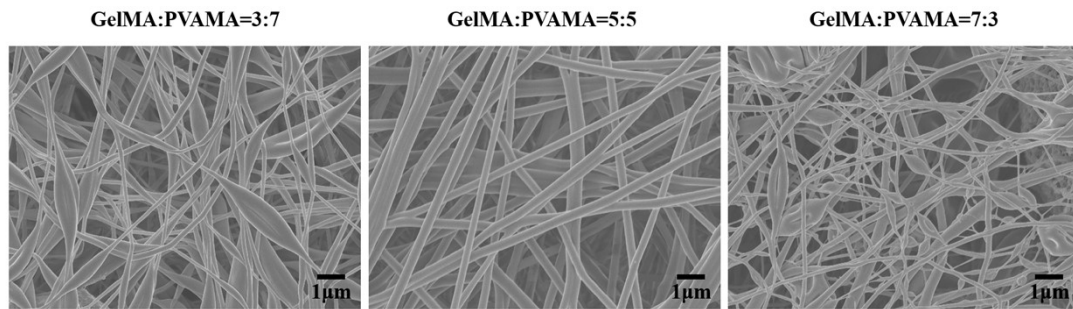

**Figure S3.** SEM Diagram of GelMA: PVAMA Spinning with Different Proportions.

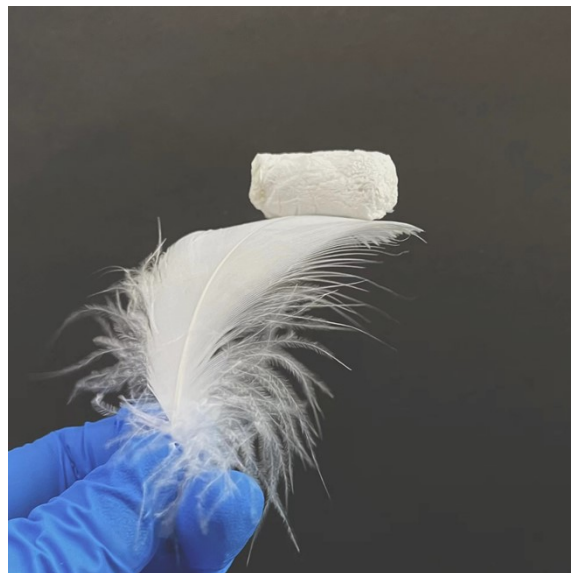

**Figure S4.** New aerogel placed on feathers.

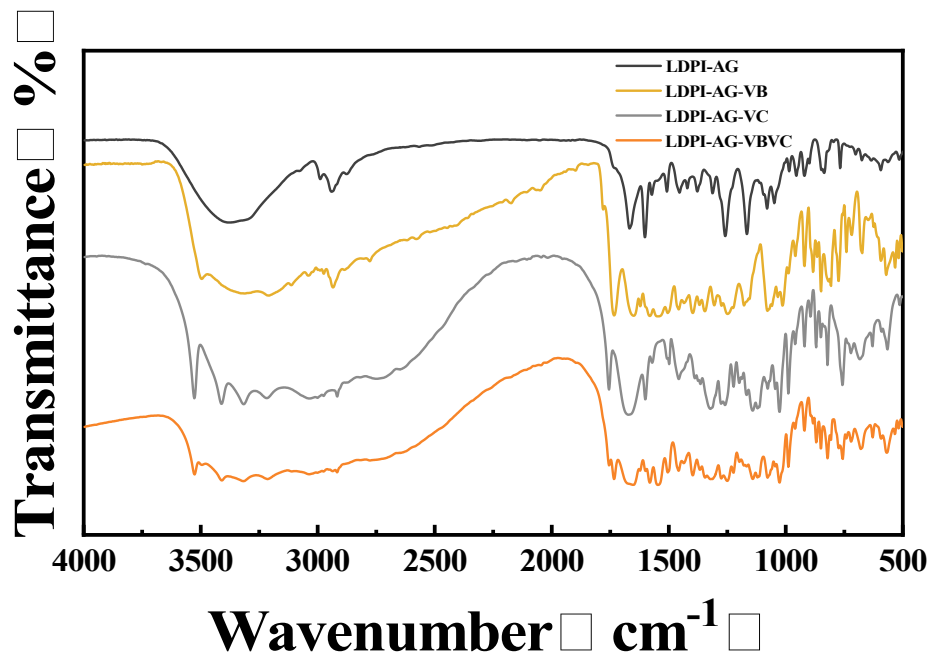

Figure S5. Fourier transform spectroscopy of each group of scaffolds.

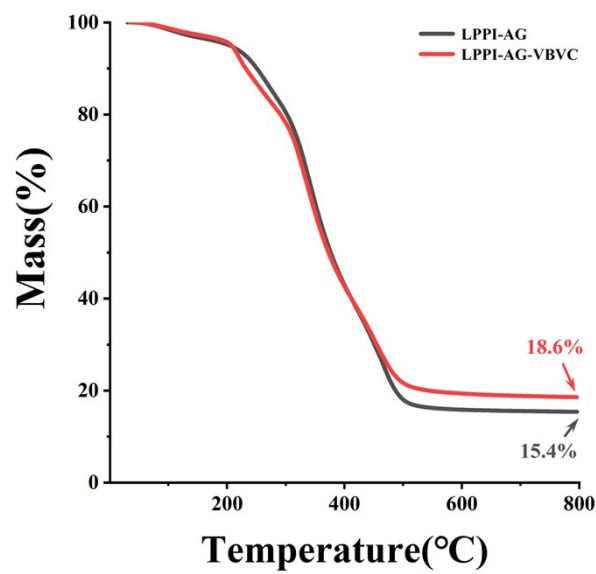

Figure S6. Thermogravimetry of the scaffolds

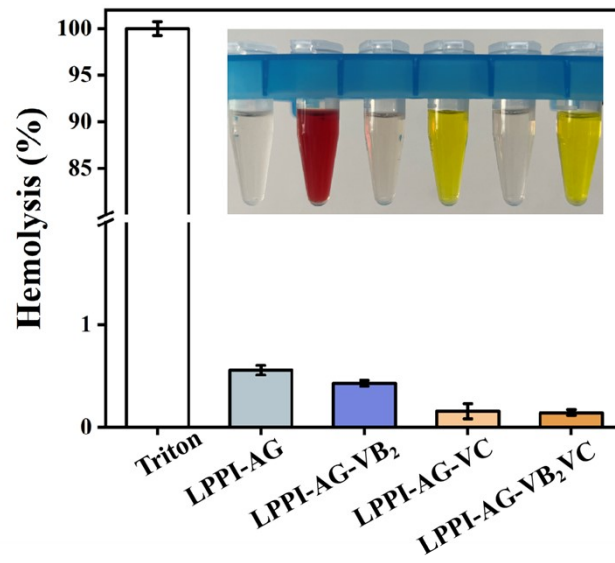

**Figure S7.** Hemolysis ratio of the scaffolds (PC: 0.1% Triton X-100, NC: PBS).

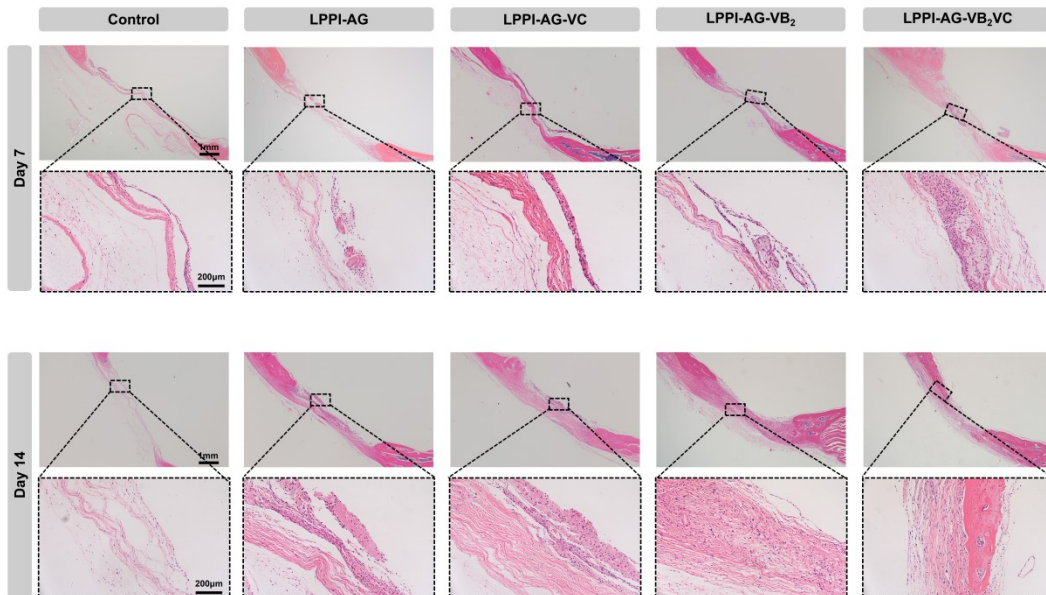

**Figure S8.** HE staining of scaffolds in each group 4 weeks and 8 weeks after implantation in mouse calvarial defects.

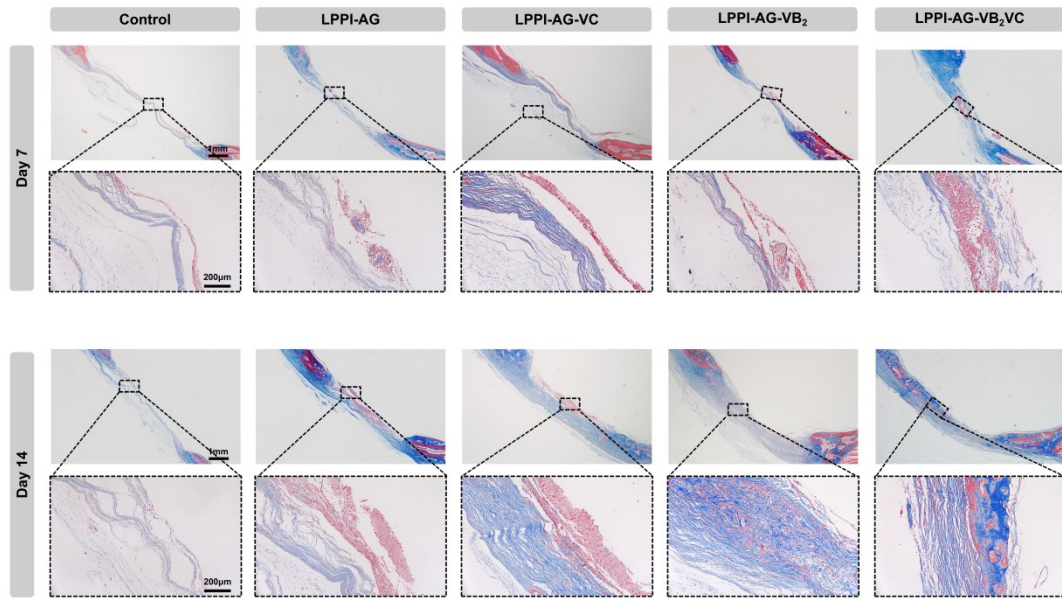

**Figure S9.** MASSON staining of scaffolds in each group 4 weeks and 8 weeks after implantation in mouse calvarial defects.

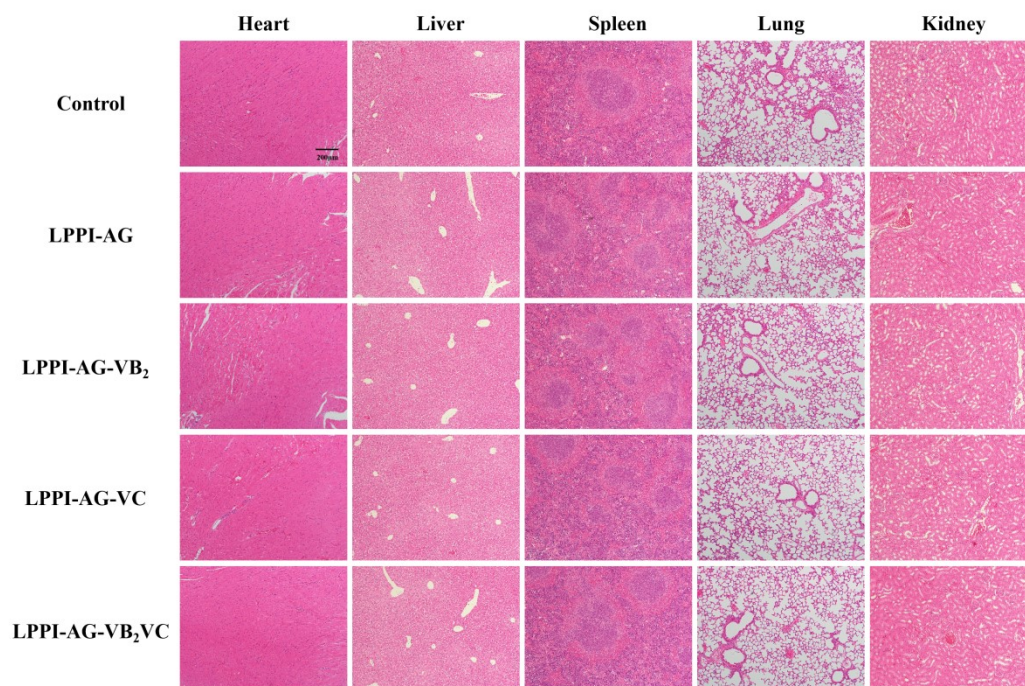

**Figure S10.** HE staining images of major organs in various groups.

| Gene name    | Forward Premier (from 5'-3') | Reverse Premier (from 5'-3') |
|--------------|------------------------------|------------------------------|
| <b>GAPDH</b> | CTGGAGAAACCTGCCAAGTATG       | GGTGAAGAATGGGAGTTGCT         |
| <b>OCN</b>   | TGACAAAGCCTTCATGTCCAA        | CTCCAAGTCCATTGTTGAGGTAG      |
| <b>Col I</b> | CCCAGCGGTGGTTATGACTT         | TCGATCCAGTACTCTCCGCT         |
| <b>Runx2</b> | CAGTATGAGAGTAGGTGTCCCGC      | AAGAGGGGTAAGACTGGTCATAGG     |
| <b>Alp</b>   | CGGACCCTGCCTTACCAA           | GACCTGAGCGTTGGTGTGTA         |

**Table S1.** Primers for RT-qPCR analysis.
